# Supplementary material for: Tang-Nai-Kang Alleviates Pre-diabetes and Metabolic Disorders and Induces a Gene Expression Switch toward Fatty Acid Oxidation in SHR.Cg-Leprcp/NDmcr Rats
Source: PubMed Central journal article supplement (PMC4395456; doi:10.1371/journal.pone.0122024), 2015-04-13
Supplement: pone.0122024.s005.pdf [file pone.0122024.s005.pdf]

**S2 Table. Rat primers used for PCR analysis.**

| No. |                     | Forward primer sequence    | Reverse primer sequence |
|-----|---------------------|----------------------------|-------------------------|
| 1   | SIRT1               | TGAAGCTGTTTCGTGGAGATATTTTT | CATGATGGCAAGTGGCTCAT    |
| 2   | PPAR $\gamma$       | GAGATCCTCCTGTTGACCCAG      | CCACAGAGCTGATTCCGAAGT   |
| 3   | CEBP $\alpha$       | TACCGAGTAGGGGGAGCAAA       | CCTCTAAGGACAGGGACGGA    |
| 4   | FABP4               | AGAACTCACTGGGACCTGGA       | TCTCGGACAGCAATCAGCTC    |
| 5   | HSL                 | AGTGAAAAACCCGCGGACC        | TTCATCCTTCTGCCCCCTAC    |
| 6   | PGC1 $\alpha$       | TGGAGTGACATAGAGTGTGCTG     | TATGTTTCGCGGGCTCATTGT   |
| 7   | PPAR $\alpha$       | GTCCTCTGGTTGTCCCCTTG       | GTCAGTTCACAGGGAAGGCA    |
| 8   | PPAR $\beta/\delta$ | GTATCCGCAAGCCCTTCAGT       | GATGGCGGCAATGAAAAGGG    |
| 9   | HK2                 | CTGGTGAGCCATCGTGGTTA       | AAGCAGGCGATCATATGCGA    |
| 10  | PFKFB3              | CGCAATAGTGTCACCCCACT       | TCCCTAGCAAAGGTTGTCCG    |
| 11  | FOXO1               | CAGGCCGGAGTTTAACCAGT       | CTCGCTCTCTTCTAGCAGGC    |
| 12  | ERR $\alpha$        | GGTGGCCGACAGAAGTACAA       | GGCGTACAGCTTCTCAGGTT    |
| 13  | TFAM                | TTCCAGGGGGCTAAGGATGA       | CACACTGCGACGGATGAGAT    |
| 14  | LCAD                | CCCTGGTTTCAGCCTCCATT       | TCACTCCCAGACCTTTTGGC    |
| 15  | MCAD                | AGCCTTCACCGGATTCATCG       | AGCCCCCATTGCAATCTTGA    |
| 16  | PDK4                | TATCGACCCCAACTGCGATG       | TGGATTGGTTGGCCTGGAAA    |
| 17  | GCK                 | CCTGGGAGGAACCAACTTCA       | TCTTGTGCTTCATCATCTCGGC  |
| 18  | PEPCK               | TGCCCAAGATCTTCCACGTC       | TCAAGTTCAGGGCGTCTTCC    |
| 19  | G6Pase              | GGACCTCCTGTGGACTTTGG       | AAACGGAATGGGAGCGACTT    |
| 20  | Acox1               | CTCACTCGAAGCCAGCGTTA       | TTGAGGCCAACAGGTTCCAC    |

|    |           |                       |                        |
|----|-----------|-----------------------|------------------------|
| 21 | AdipoR2   | GGGTCAGAGCAGGAGTGTTTC | AGAGGGCAGCTCCTGTGATA   |
| 22 | Tnl(Slow) | GGTGGCAGAGCGAGAAGAG   | TTTTCCGCTGCTCAAAGTGC   |
| 23 | MHCIIa    | CCGCGAGGTTACACTAAAG   | TGCCTCTCTTCGGTCATTCT   |
| 24 | MHCIIb    | AAGAGCCGAGAGGTTACAC   | TGTCACCTTTCAACAGAAGGAA |
| 25 | MHCI      | ACCTGATGGTGGATGTGGAG  | CTTCTGCTTCCACTCAACCA   |
| 26 | CoxIV     | CTCGAGCGAGATGGCTTCAA  | GTAGGGACACCACCTCCAGA   |
| 27 | Actin     | CGTCTTCCCCTCCATCGT    | GGAGTCCTTCTGACCCATACC  |

Acox1, acetyl-CoA carboxylase 1; AdipoR2, adiponectin receptor 2; CEBP $\alpha$ , CCAAT/enhancer-binding protein  $\alpha$ ; CPT1 $\alpha$ , carnitine palmitoyltransferase 1 $\alpha$ ; CoxIV, cytochrome c oxidase subunit IV; ERR $\alpha$ , estrogen related receptor  $\alpha$ ; FABP4, fatty acid-binding protein 4; FOXO1, forkhead transcription factor 1; G6Pase, glucose-6-phosphatase; GCK, glucokinase; HK2, hexokinase 2; HSL, hormone-sensitive lipase; LCAD, long-chain-acyl-CoA dehydrogenase; MHCI, MHCIIa, MHCIIb, myosin heavy chains, type I, IIa, IIb; PDK4, pyruvate dehydrogenase kinase 4; PEPCK, phosphoenolpyruvate carboxykinase; PFKFB3, 6-phosphofructo-2-kinase/fructose-2, 6-biphosphatase 3; PGC1 $\alpha$ , peroxisome proliferator-activated receptor  $\gamma$  coactivator 1 $\alpha$ ; PPAR $\alpha$ , PPAR $\beta/\delta$ , PPAR $\gamma$ , peroxisome proliferator activated receptor- $\alpha$ , - $\beta/\delta$ , - $\gamma$ ; SIRT1, sirtuin 1; TFAM, mitochondrial transcription factor; Tnl(slow), slow twitch skeletal muscle troponin I. Actin was used as reference gene.
