# Supplementary material for: Tang-Nai-Kang Alleviates Pre-diabetes and Metabolic Disorders and Induces a Gene Expression Switch toward Fatty Acid Oxidation in SHR.Cg-Leprcp/NDmcr Rats
Source: PubMed Central journal article supplement (PMC4395456; doi:10.1371/journal.pone.0122024), 2015-04-13
Supplement: pone.0122024.s006.pdf [file pone.0122024.s006.pdf]

## **S1 Text. Spectrophotometry analysis method.**

### **Determination of total polysaccharides (TP) in the water extract of TNK (TWE)**

TWE (1.0 g) was precipitated using 95% (v/v) ethanol and then separated by centrifugation (3000 × g for 5 min). The precipitate was dissolved in deionized water, and the TP content was measured using the phenol-sulfuric colorimetric method at 490 nm, with glucose as a standard [1]. The TP yield (% w/w) was calculated using the following equation: TP yield (% w/w) = total polysaccharides weight/water extract weight × 100.

### **Determination of total flavonoids (TF) in the ethanol extract of TNK (TEE)**

Extraction of TF from TEE (2.0 g) was performed as described previously, and the TF content was measured using the aluminum chloride method at 410 nm, with rutin as a standard [2]. The TF yield (% w/w) was calculated using the following equation: TF yield (% w/w) = total flavonoids weight/ethanol extract weight × 100.

### **Determination of triterpenoid saponin (TS) in the TEE**

Using ursolic acid as a standard, TS in the TEE was determined using the spectrophotometry method at 550 nm, with 5% vanillin-glacial acetic acid solution and perchloric acid as color-developing agents [3]. The TS yield (% w/w) was calculated using the following equation: TS yield (% w/w) = total saponin weight/ethanol extract weight × 100.

## References

1. Koh GY, Chou G, Liu Z (2009) Purification of a water extract of Chinese sweet tea plant (*Rubus suavissimus* S. Lee) by alcohol precipitation. *J Agric Food Chem* 57: 5000-5006.
2. Wang Q, Jiang C, Fang S, Wang J, Ji Y, et al. (2013) Antihyperglycemic, antihyperlipidemic and antioxidant effects of ethanol and aqueous extracts of *Cyclocarya paliurus* leaves in type 2 diabetic rats. *J Ethnopharmacol* 150: 1119-1127.
3. Gao XH, Xu XX, Pan R, Li Y, Luo YB, et al. (2009) Saponin fraction from *Astragalus membranaceus* roots protects mice against polymicrobial sepsis induced by cecal ligation and puncture by inhibiting inflammation and upregulating protein C pathway. *J Nat Med* 63: 421-429.
